# Supplementary material for: Superior low-temperature NO catalytic performance of PrMn2O5 over SmMn2O5 mullite-type catalysts
Source: Royal Society of Chemistry journal article supplement (doi:10.1039/c9cy00490d), 2019-01-01
Supplement: c9cy00490d1.pdf [file c9cy00490d1.pdf]

## Supplementary Information

# Superior Low-temperature NO Catalytic Performance of PrMn<sub>2</sub>O<sub>5</sub> Over SmMn<sub>2</sub>O<sub>5</sub> Mullite-type Catalysts

Sampreetha Thampy,<sup>a</sup> Nickolas Ashburn,<sup>a</sup> Chengfa Liu,<sup>b</sup> Ka Xiong,<sup>b</sup> Sean Dillon,<sup>a</sup> Yongping Zheng,<sup>a</sup> Yves J Chabal,<sup>a</sup> Kyeongjae Cho,<sup>a</sup> and Julia W. P. Hsu\*<sup>a</sup>

<sup>a</sup> Department of Materials Science & Engineering, University of Texas at Dallas, Richardson, Texas 75080, United States

<sup>b</sup> Dongguan Innovative New Materials Co. Ltd, Room 206, Building No.5, Incubation Park for Sci&Tech SMEs, Songshan Lake, Dongguan, Guangdong China 523808

\* Corresponding author: Department of Materials Science and Engineering, University of Texas at Dallas, Richardson, Texas 75080, United States; Phone: +1 (972) 883-5789

E-mail: [jwhsu@utdallas.edu](mailto:jwhsu@utdallas.edu)

NO conversion efficiencies of PrMn<sub>2</sub>O<sub>5</sub> and SmMn<sub>2</sub>O<sub>5</sub> samples synthesized under similar hydrothermal conditions of 180 °C for 24 h and processed with different concentrations of HNO<sub>3</sub> (0-8%) are measured to optimize the processing condition to facilitate maximum conversion of NO. The NO conversion efficiency as a function of reaction temperature for samples treated with 0% (black triangles), 2% (red circles), and 8% (blue squares) HNO<sub>3</sub> are shown in Fig. S1. The activity of PrMn<sub>2</sub>O<sub>5</sub> (Fig. S1a) improved only slightly from no acid wash (Fig. S1a, black triangles) to 2% HNO<sub>3</sub> wash (Fig. S1a, red circles), while washing with 8% HNO<sub>3</sub> (Fig. S1a, blue squares) shows the best performance. On the other hand, the best conversion efficiency for SmMn<sub>2</sub>O<sub>5</sub> (Fig. S1b,) is obtained with washing with 2% HNO<sub>3</sub> (Fig. S1b, red circles) while further increase in acid concentration to 8% (Fig. S1b, blue squares) decreased the catalytic activity. Therefore, we determine 8% and 2% acid wash to be the optimal processing condition

for  $\text{PrMn}_2\text{O}_5$  and  $\text{SmMn}_2\text{O}_5$ , respectively. Hence, these two processing conditions were used for this study.

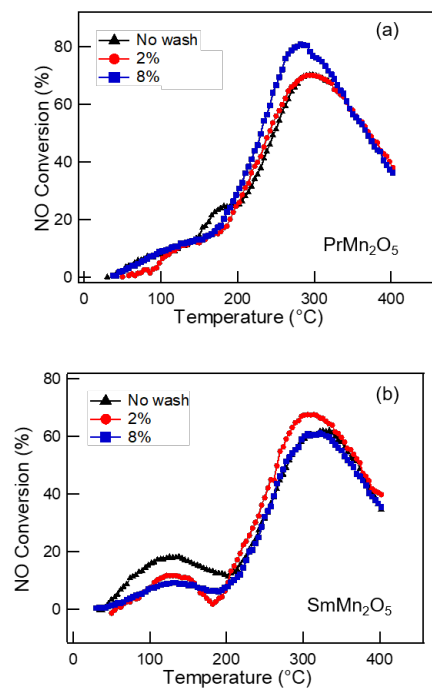

**Fig. S1.** NO conversion efficiency as a function of temperature for (a)  $\text{PrMn}_2\text{O}_5$ ; (b)  $\text{SmMn}_2\text{O}_5$  with no acid wash (black triangles), 2%  $\text{HNO}_3$  wash (red circles), and 8%  $\text{HNO}_3$  wash (blue squares), respectively. The reaction gas composition consisted of 400 ppm NO, 10%  $\text{O}_2$ , and  $\text{N}_2$  balance at a space velocity of  $100000 \text{ h}^{-1}$ .

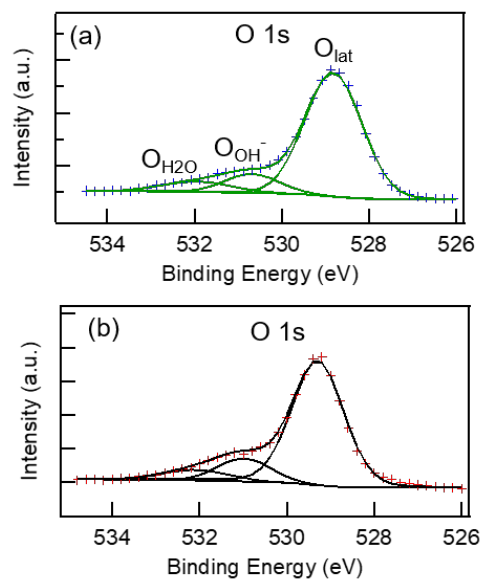

**Fig. S2.** XPS spectra of O 1s core-levels in (a) PrMn<sub>2</sub>O<sub>5</sub> (blue); (b) SmMn<sub>2</sub>O<sub>5</sub> (red) samples, respectively. The green and black lines represent the peak fitting on PrMn<sub>2</sub>O<sub>5</sub> and SmMn<sub>2</sub>O<sub>5</sub>, respectively.

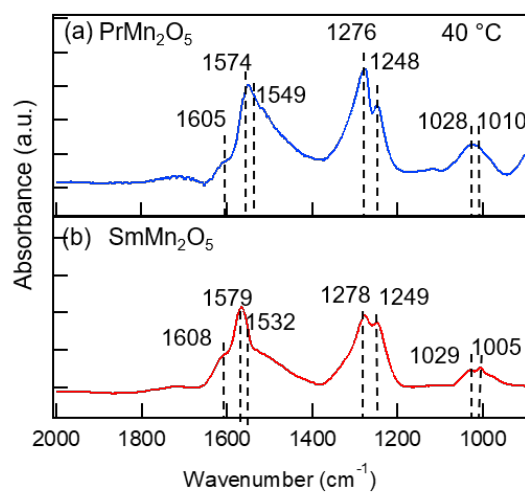

**Fig. S3.** FTIR spectra after coadsorption of 1% NO and 10% O<sub>2</sub> balanced with He at 40 °C on (a) PrMn<sub>2</sub>O<sub>5</sub> (blue) and (b) SmMn<sub>2</sub>O<sub>5</sub> (red), respectively.

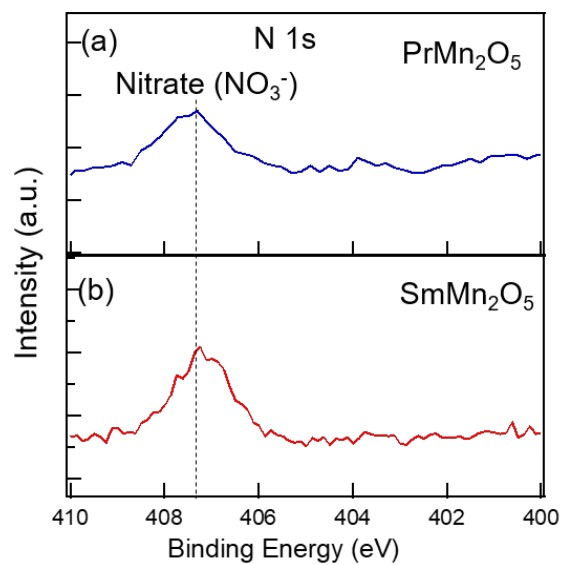

**Fig. S4.** N 1s XPS spectra shows nitrate at 407.3 eV as the dominant intermediate species formed after exposure to NO at 40 °C on (a) PrMn<sub>2</sub>O<sub>5</sub> (blue) and (b) SmMn<sub>2</sub>O<sub>5</sub> (red), respectively.
